# Supplementary material for: The Role of Vitamin D Supplementation on Airway Remodeling in Asthma: A Systematic Review
Source: MDPI journal article supplement (doi:10.3390/nu15112477), 2023-05-26
Supplement: s1 [file s1]

|       |                                | Risk of bias domains                                                                                                                                                                                                                                        |    |    |    |    |                                   |
|-------|--------------------------------|-------------------------------------------------------------------------------------------------------------------------------------------------------------------------------------------------------------------------------------------------------------|----|----|----|----|-----------------------------------|
|       |                                | D1                                                                                                                                                                                                                                                          | D2 | D3 | D4 | D5 | Overall                           |
| Study | Bossé Y et al.(2007) [31]      |                                                                                                                                                                                                                                                             |    |    |    |    |                                   |
|       | Song Y et al. (2007) [27]      |                                                                                                                                                                                                                                                             |    |    |    |    |                                   |
|       | Damera G. (2009) [30]          |                                                                                                                                                                                                                                                             |    |    |    |    |                                   |
|       | Song Y et al. (2013) [26]      |                                                                                                                                                                                                                                                             |    |    |    |    |                                   |
|       | Britt RD Jr et al.(2016) [28]  |                                                                                                                                                                                                                                                             |    |    |    |    |                                   |
|       | Kim, Sung-Ho et al.(2017) [25] |                                                                                                                                                                                                                                                             |    |    |    |    |                                   |
|       | Plesa M et al. (2020) [32]     |                                                                                                                                                                                                                                                             |    |    |    |    |                                   |
|       | Schrumpf JA.(2020) [29]        |                                                                                                                                                                                                                                                             |    |    |    |    |                                   |
|       | Jin A et al. (2021) [24]       |                                                                                                                                                                                                                                                             |    |    |    |    |                                   |
|       |                                | Domains:<br>D1: Bias arising from the randomization process.<br>D2: Bias due to deviations from intended intervention.<br>D3: Bias due to missing outcome data.<br>D4: Bias in measurement of the outcome.<br>D5: Bias in selection of the reported result. |    |    |    |    | Judgement<br>Some concerns<br>Low |

**Supplementary Figure S1: Bias assessment of included studies using Revised Cochrane risk-of-bias tool for randomized trials (RoB 2).** Assessment of the risk of bias via the Cochrane RoB 2 tool displayed by means of a traffic light plot of the risk of bias of each included clinical study .Traffic light plot reports five risk of bias domains: D1, bias arising from the randomization process; D2, bias due to deviations from intended intervention; D3, bias due to missing outcome data; D4, bias in measurement of the outcome; D5, bias in selection of the reported result; Yellow circle indicates some concerns on the risk of bias and green circle represents low risk of bias. Note: Figure image was created using .

Abbreviation: RoB, risk of bias.
